# Supplementary material
Source: Springer Nature journal article supplement (https://www.springermedizin.de/resource/supplementary/12998_2009_128_MOESM2_ESM.pdf/9623620)

A.

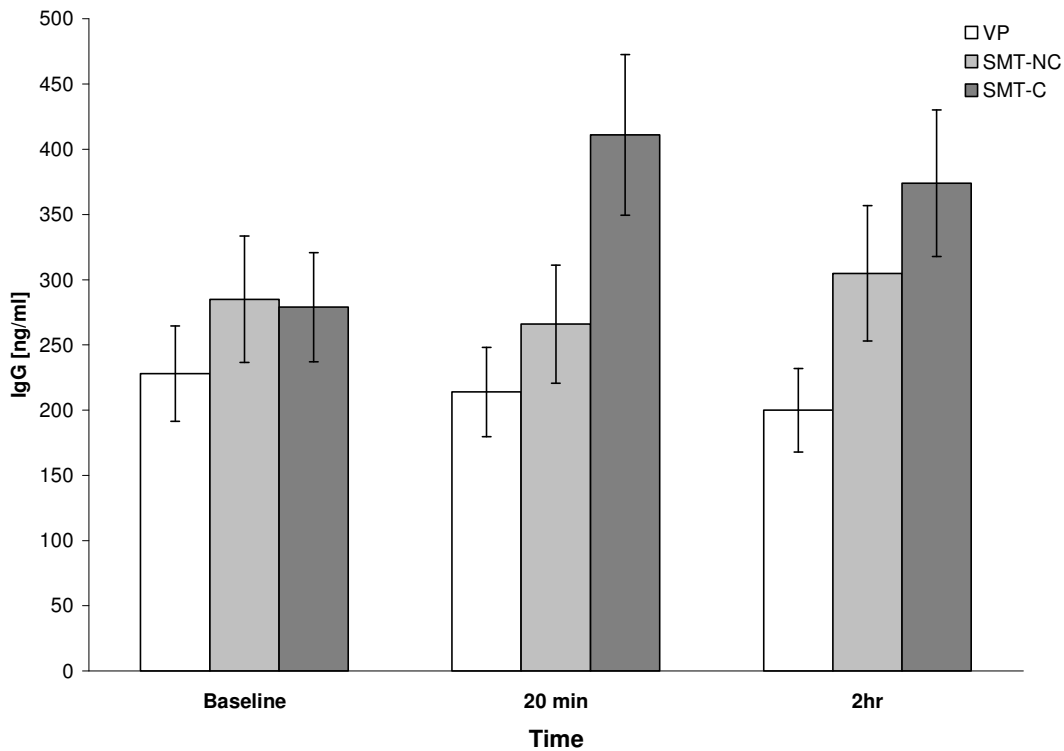

B.

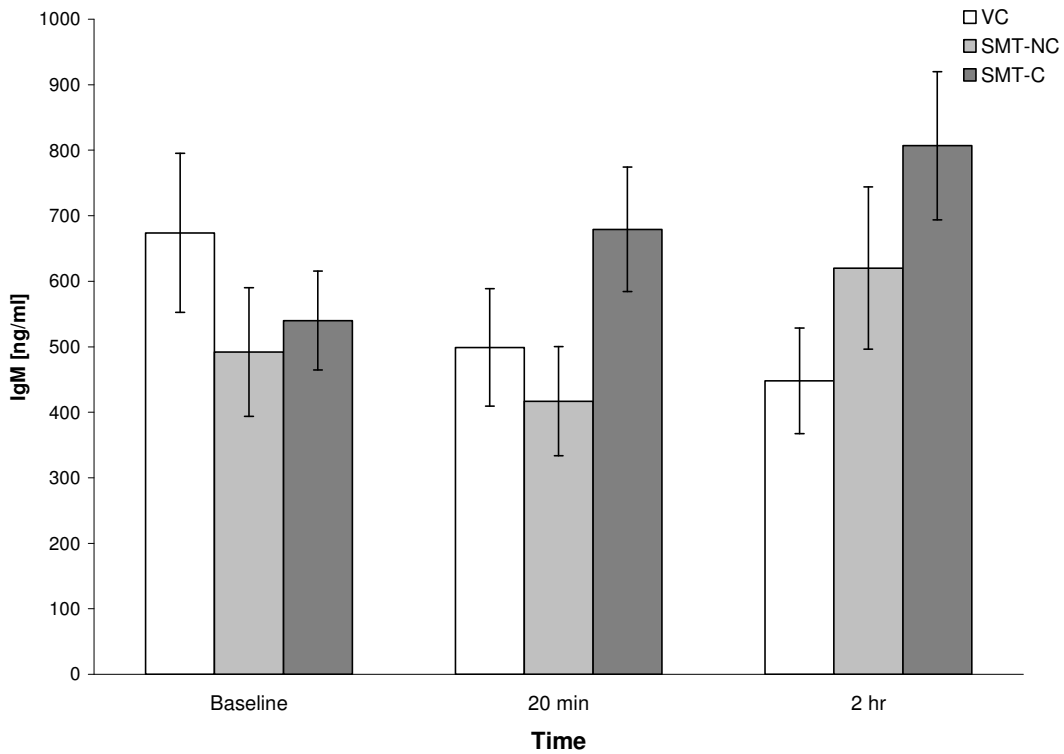

Supplement: MOESM2 [file 9623620]
